# Supplementary material
Source: PubMed Central journal article supplement (PMC4245376)
Supplement: NIHMS622663-supplement-Supp_TableS1-S3.pdf [file NIHMS622663-supplement-Supp_TableS1-S3.pdf]

**Supplementary table 1** Coffee type and caffeinated status for each coffee item identified by USDA food code in dietary recall, NHANES 1999-2010

| USDA food code | USDA food descriptions                                                                                                                                                                                                                                    | Caffeinated status <sup>a</sup> |
|----------------|-----------------------------------------------------------------------------------------------------------------------------------------------------------------------------------------------------------------------------------------------------------|---------------------------------|
| 92101000       | Coffee, made from ground, regular<br>(Include coffee, made from ground, NS as to regular or decaffeinated; made from filter pack; and Coffee Singles)                                                                                                     | U                               |
| 92103000       | Coffee, made from powdered instant, regular<br>(Include coffee, made from powdered instant, NS as to regular or decaffeinated; and made from freeze-dried)                                                                                                | U                               |
| 92111010       | Coffee, decaffeinated, made from ground<br>(Include made from filter pack; and Coffee Singles)                                                                                                                                                            | D                               |
| 92114000       | Coffee, decaffeinated, made from powdered instant<br>(Include made from freeze-dried)                                                                                                                                                                     | D                               |
| 92100500       | Coffee, regular, NS as to ground or instant                                                                                                                                                                                                               | R                               |
| 92101500       | Coffee, made from ground, equal parts regular and decaffeinated<br>(Include Maxwell House Lite Reduced Caffeine Ground Coffee)                                                                                                                            | R                               |
| 92101900       | Coffee, latte<br>(Include NS as to regular or decaffeinated)                                                                                                                                                                                              | U                               |
| 92161000       | Cappuccino                                                                                                                                                                                                                                                | U                               |
| 92111000       | Coffee, decaffeinated, NS as to ground or instant                                                                                                                                                                                                         | D                               |
| 92121000       | Coffee, made from powdered instant mix, with whitener and sugar, instant<br>(Include Cafe au Lait; Orange Cappuccino; Cafe Amaretto; Cafe Francais; General Foods International Coffee flavors; Italian Cappuccino; Cafe Vienna; and French Vanilla Cafe) | R                               |
| 92101950       | Coffee, mocha<br>(Include Cafe mocha)                                                                                                                                                                                                                     | R                               |
| 92101610       | Coffee, espresso<br>(Include demi-tasse)                                                                                                                                                                                                                  | R                               |
| 92101920       | Blended coffee beverage, made with regular coffee, milk, and ice, sweetened<br>(Include NS as to regular or decaffeinated)                                                                                                                                | U                               |
| 92130000       | Coffee, regular, presweetened with sugar, pre-lightened<br>(Include coffee, light, with sugar, from vending machine; iced coffee, NS as to regular or decaffeinated, NS as to type of sweetener; and McDonald's iced coffee)                              | U                               |
| 92191100       | Coffee, dry instant powder, regular<br>(Include freeze-dried)                                                                                                                                                                                             | R                               |
| 92191200       | Coffee, dry instant powder, decaffeinated<br>(Include freeze-dried)                                                                                                                                                                                       | D                               |
| 92101800       | Coffee, Cuban<br>(Include sweetened espresso)                                                                                                                                                                                                             | R                               |
| 92121040       | Coffee, made from powdered instant mix, with whitener and low calorie sweetener<br>(Include Sugar Free Cafe au Lait; Sugar Free Cafe Amaretto; General Foods International Coffee flavors; Sugar Free Cafe Vienna; and Sugar Free French Vanilla Cafe)    | R                               |
| 92100000       | Coffee, NS as to type                                                                                                                                                                                                                                     | U                               |
| 92121020       | Coffee and cocoa (mocha), made from powdered instant mix, with whitener, presweetened<br>(Include NS as to sweetener; Suisse Mocha; General Foods International Coffee flavors; Viennese Chocolate Cafe; and Cafe Mocha Cappuccino)                       | R                               |
| 92101910       | Coffee, latte, decaffeinated                                                                                                                                                                                                                              | D                               |
| 92121010       | Coffee, made from powdered instant mix, presweetened, no whitener                                                                                                                                                                                         | R                               |
| 92101700       | Coffee, made from ground, regular, flavored<br>(Include made from filter pack)                                                                                                                                                                            | R                               |
| 92162000       | Cappuccino, decaffeinated                                                                                                                                                                                                                                 | D                               |
| 92104000       | Coffee, made from powdered instant, 50% less caffeine<br>(Include Maxwell House Lite Reduced Caffeine Instant Coffee)                                                                                                                                     | R                               |
| 92101630       | Coffee, espresso, decaffeinated                                                                                                                                                                                                                           | D                               |

|          |                                                                                                                                                                                                                                                                                                          |   |
|----------|----------------------------------------------------------------------------------------------------------------------------------------------------------------------------------------------------------------------------------------------------------------------------------------------------------|---|
|          | Coffee and cocoa (mocha), made from powdered instant mix, with whitener and low calorie sweetener, decaffeinated<br>(Include Naturally Decaffeinated Sugar Free Suisse Mocha; and General Foods International Coffee flavors)                                                                            | D |
| 92121050 | International Coffee flavors)                                                                                                                                                                                                                                                                            | D |
| 92105010 | Coffee, made from liquid concentrate                                                                                                                                                                                                                                                                     | R |
| 92101930 | Blended coffee beverage, made with decaffeinated coffee, milk, and ice, sweetened<br>Coffee and cocoa (mocha), made from powdered instant mix, with whitener and low calorie sweetener<br>(Include Sugar Free Irish Mocha Mint; Sugar Free Suisse Mocha; and General Foods International Coffee flavors) | D |
| 92121030 | International Coffee flavors)                                                                                                                                                                                                                                                                            | R |
|          | Coffee, decaffeinated, presweetened with sugar, pre-lightened<br>(Include coffee, decaffeinated, light, with sugar, from vending machine; and iced coffee, decaffeinated, with sugar)                                                                                                                    | D |
| 92130001 | Coffee, pre-lightened, no sugar<br>(Include from vending machine)                                                                                                                                                                                                                                        | R |
| 92130010 | Coffee, presweetened with sugar<br>(Include from vending machine)                                                                                                                                                                                                                                        | R |
| 92130020 | Coffee, dry instant powder, NS as to regular or decaffeinated<br>(Include freeze-dried)                                                                                                                                                                                                                  | U |
| 92191000 | Coffee, dry instant powder, with whitener and sugar<br>(Include Cafe au Lait; Orange Cappuccino; Cafe Amaretto; Cafe Francais; General Foods International Coffee flavors; Cafe Vienna; and French Vanilla Cafe)                                                                                         | R |
| 92193000 | Foods International Coffee flavors; Cafe Vienna; and French Vanilla Cafe)                                                                                                                                                                                                                                | R |
| 92101600 | Coffee, Turkish<br>Coffee, acid neutralized, from powdered instant<br>(Include Kava)                                                                                                                                                                                                                     | R |
| 92106000 | Coffee, mocha, made with soy milk<br>Coffee, regular, with low-calorie sweetener, pre-lightened<br>(Include coffee, light, low calorie sweetener, from vending machine; and iced coffee, with low calorie sweetener)                                                                                     | R |
| 92130005 | Coffee, decaffeinated, with low-calorie sweetener, pre-lightened<br>(Include coffee, decaffeinated, light, with low calorie sweetener, from vending machine; and iced coffee, decaffeinated, with low calorie sweetener)                                                                                 | D |
| 92130006 | Coffee, dry, acid neutralized<br>(Include Kava)                                                                                                                                                                                                                                                          | R |
| 92191250 | Coffee, liquid concentrate                                                                                                                                                                                                                                                                               | R |
| 92105000 | Coffee and chicory, made from ground                                                                                                                                                                                                                                                                     | R |
| 92152000 | Coffee and cocoa (mocha) mix, dry instant powder with whitener, presweetened<br>(Include Irish Mocha Mint; Suisse Mocha; and General Foods International Coffee flavors)                                                                                                                                 | R |
| 92192000 | Coffee and cocoa (mocha) mix, dry instant powder, with whitener and low calorie sweetener, decaffeinated<br>(Include Naturally Decaffeinated Sugar Free Suisse Mocha; and General Foods International Coffee flavors)                                                                                    | D |
| 92192040 | Coffee, dry instant powder, with whitener and low calorie sweetener<br>(Include Sugar Free Cafe au Lait; Sugar Free Orange Cappuccino; Sugar Free Cafe Amaretto; General Foods International Coffee flavors; Sugar Free Cafe Vienna; and Sugar Free French Vanilla)                                      | R |
| 92193020 | Sugar Free French Vanilla                                                                                                                                                                                                                                                                                | R |

<sup>a</sup> Caffeinated status: D=decaf, R=regular, U=unspecified

**Supplementary table 2** Multivariate <sup>a</sup> adjusted serum levels of ALT, AST, ALP and GGT, by categories of coffee reported in FFQ, NHANES (2003-2006)

|     | coffee, cup/day           |                   |                   |                   |                   | p trend |
|-----|---------------------------|-------------------|-------------------|-------------------|-------------------|---------|
|     | 0                         | <1                | 1-<2              | 2-<3              | 3+                |         |
|     | Total coffee              |                   |                   |                   |                   |         |
| ALT | 22.5 (22.0, 23.1)         | 22.1 (22.1, 23.9) | 22.4 (22.2, 24.4) | 22.5 (22.3, 24.5) | 21.4 (20.9, 23.7) | 0.76    |
| AST | 23.7 (23.3, 24.1)         | 23.4 (23.1, 24.9) | 23.5 (23.3, 25.0) | 23.2 (23.0, 24.6) | 22.3 (21.9, 23.8) | 0.09    |
| ALP | 65.8 (64.6, 67.0)         | 63.7 (63.7, 67.2) | 62.1 (61.6, 66.0) | 61.5 (60.8, 65.6) | 60.1 (59.2, 64.3) | 0.0002  |
| GGT | 20.3 (19.4, 21.2)         | 19.7 (18.8, 20.7) | 19.7 (18.7, 20.7) | 19.8 (18.8, 20.9) | 18.2 (17.1, 19.4) | 0.04    |
|     | Decaf coffee <sup>b</sup> |                   |                   |                   |                   |         |
| ALT | 22.5 (22.0, 23.1)         | 22.5 (21.4, 23.6) | 23.3 (21.8, 24.8) | 23.6 (22.0, 25.3) | 17.1 (15.5, 18.9) | 0.84    |
| AST | 23.7 (23.3, 24.1)         | 23.5 (22.4, 24.6) | 24.2 (23.0, 25.4) | 24 (22.6, 25.4)   | 19.8 (18.6, 21.1) | 0.76    |
| ALP | 65.8 (64.6, 67.0)         | 62.9 (60.6, 69.0) | 59.9 (57.0, 66.5) | 61.2 (59.3, 66.6) | 52.5 (47.0, 61.9) | 0.0003  |
| GGT | 20.3 (19.4, 21.2)         | 18.3 (16.6, 20.1) | 19.1 (17.1, 21.4) | 19.4 (17.6, 21.4) | 15.4 (13.1, 18.0) | 0.04    |

<sup>a</sup> Adjusted for age (20-34, 35-49, 50-64, 65-85 yr), gender (male, female), race and ethnicity (Mexican American, other Hispanic, non-Hispanic White, non-Hispanic Black, other), education (less than 9<sup>th</sup> grade, 9-11<sup>th</sup> grade, high school/GED, some college or AA degree, college and higher), smoking status (Never, former, current smoker with <1 pck/d, current smoker with 1+ pck/d, missing), alcohol consumption (non-drinker, <1, 1-<3, 3-<7 drink/week, 1-<2, 2+ drink/day, missing), day of recall (Monday, Tuesday, Wednesday, Thursday, Friday, Saturday and Sunday), hepatitis B (positive serum hepatitis B surface antigen and core antibody, negative) and hepatitis C (positive serum hepatitis C antibody, negative).

<sup>b</sup> This analysis included people who reported that they did not drink coffee (the “0” group) and those who reported “almost always or always” to the question “how often was the coffee you drank decaffeinated?”



|            |               |                   |                   |                   |                   |                   |        |      |
|------------|---------------|-------------------|-------------------|-------------------|-------------------|-------------------|--------|------|
|            | Nondrinker    | 22.8 (22.5, 23.1) | 23.4 (22.8, 23.9) | 22.9 (22.3, 23.5) | 23.1 (22.4, 23.8) | 22.9 (22.3, 23.5) | 0.63   |      |
|            | <2 drinks/day | 23.5 (23.3, 23.8) | 23.8 (23.4, 24.2) | 23.1 (22.8, 23.5) | 23.3 (22.9, 23.7) | 22.8 (22.4, 23.3) | 0.0004 |      |
|            | 2+ drinks/day | 29.0 (27.7, 30.4) | 27.0 (24.8, 29.3) | 26.8 (24.6, 29.1) | 26.5 (24.5, 28.7) | 26.3 (24.1, 28.8) | 0.02   |      |
| <i>ALP</i> |               |                   |                   |                   |                   |                   |        | 0.70 |
|            | Nondrinker    | 70.8 (69.8, 71.9) | 68.1 (66.3, 70.0) | 68.4 (66.8, 70)   | 67.3 (65.4, 69.3) | 68.5 (66.2, 70.8) | 0.0004 |      |
|            | <2 drinks/day | 65.4 (64.5, 66.3) | 62.1 (60.8, 63.5) | 63.1 (62.0, 64.3) | 63.0 (61.4, 64.7) | 61.5 (60.1, 63.1) | <.0001 |      |
|            | 2+ drinks/day | 69.9 (68.2, 71.7) | 69.9 (64.5, 75.8) | 67.9 (64.5, 71.6) | 65.5 (60.7, 70.6) | 65.1 (61.9, 68.4) | 0.003  |      |
| <i>GGT</i> |               |                   |                   |                   |                   |                   |        | 0.24 |
|            | Nondrinker    | 20.5 (19.9, 21.2) | 20.0 (19.1, 21.0) | 20.5 (19.4, 21.5) | 20.4 (19.1, 21.7) | 20.7 (19.2, 22.2) | 0.93   |      |
|            | <2 drinks/day | 21.4 (20.9, 21.8) | 20.4 (19.8, 21.1) | 20.5 (19.9, 21.2) | 21.1 (20.3, 21.9) | 19.6 (18.9, 20.4) | 0.0002 |      |
|            | 2+ drinks/day | 36.6 (33.8, 39.5) | 32.9 (28.3, 38.2) | 35.6 (30.7, 41.1) | 33.2 (28.2, 39.1) | 30.4 (25.5, 36.1) | 0.05   |      |
| Smoking    |               |                   |                   |                   |                   |                   |        |      |
| <i>ALT</i> |               |                   |                   |                   |                   |                   |        | 0.19 |
|            | Never         | 22.4 (22.0, 22.8) | 22.5 (21.9, 23.1) | 22.5 (21.9, 23.1) | 22.6 (21.8, 23.3) | 22.2 (21.5, 23.0) | 0.92   |      |
|            | Former        | 23.6 (23.4, 24.1) | 23.6 (22.7, 24.6) | 23.2 (22.4, 24.1) | 23.3 (22.3, 24.2) | 23.4 (22.5, 24.3) | 0.54   |      |
|            | Current       | 23.2 (22.6, 23.8) | 22.5 (21.5, 23.5) | 22.4 (21.5, 23.3) | 23.4 (22.2, 24.7) | 22.3 (21.2, 23.3) | 0.17   |      |
| <i>AST</i> |               |                   |                   |                   |                   |                   |        | 0.05 |
|            | Never         | 23.3 (23.1, 23.6) | 23.6 (23.2, 24.0) | 23.2 (22.8, 23.7) | 23.2 (22.7, 23.8) | 23.0 (22.4, 23.5) | 0.22   |      |
|            | Former        | 24.0 (23.6, 24.3) | 24.5 (23.7, 25.3) | 23.7 (23.1, 24.2) | 23.5 (22.9, 24.2) | 23.5 (22.8, 24.3) | 0.07   |      |
|            | Current       | 23.8 (23.3, 24.2) | 23.3 (22.7, 24.0) | 22.6 (22.0, 23.3) | 23.4 (22.6, 24.2) | 22.6 (21.9, 23.3) | 0.003  |      |
| <i>ALP</i> |               |                   |                   |                   |                   |                   |        | 0.41 |
|            | Never         | 66.5 (65.6, 67.5) | 63.6 (62.4, 64.9) | 64.1 (62.8, 65.5) | 63.6 (61.9, 65.4) | 63.2 (61.4, 65.0) | <.0001 |      |
|            | Former        | 67.9 (23.6, 24.3) | 65.9 (63.7, 68.1) | 65.5 (63.6, 67.5) | 65.3 (62.8, 67.9) | 65.1 (63.2, 67.1) | 0.001  |      |
|            | Current       | 69.8 (68.5, 71.0) | 65.8 (63.4, 68.3) | 67.2 (65.3, 69.2) | 65.5 (62.7, 68.4) | 65.9 (63.7, 68.1) | 0.0006 |      |
| <i>GGT</i> |               |                   |                   |                   |                   |                   |        | 0.03 |
|            | Never         | 20.5 (20.1, 20.9) | 19.5 (18.8, 20.3) | 20.4 (19.6, 21.1) | 20.3 (19.4, 21.3) | 20.2 (19.3, 21.2) | 0.65   |      |
|            | Former        | 22.5 (21.7, 23.4) | 22.9 (21.3, 24.5) | 21.7 (20.5, 22.9) | 22.4 (20.9, 23.9) | 21.3 (20.2, 22.5) | 0.04   |      |
|            | Current       | 24.7 (23.8, 25.6) | 22.2 (20.8, 23.7) | 23.1 (21.8, 24.5) | 23.7 (22.1, 25.5) | 21.5 (20.1, 23.0) | 0.0005 |      |



|            |     |                   |                   |                   |                   |                   |        |       |
|------------|-----|-------------------|-------------------|-------------------|-------------------|-------------------|--------|-------|
| <i>AST</i> | No  | 22.6 (22.3, 22.8) | 22.5 (22.1, 22.9) | 22.4 (22.0, 22.7) | 22.8 (22.3, 23.2) | 22.2 (21.6, 22.7) | 0.31   | 0.17  |
|            | Yes | 43.1 (38.1, 48.7) | 38.6 (31.7, 47.1) | 41.9 (35.0, 50.1) | 49.5 (38.3, 64.0) | 39.1 (32.0, 47.8) | 0.66   |       |
| <i>ALP</i> | No  | 23.4 (23.2, 23.5) | 23.6 (23.3, 23.9) | 23.0 (22.7, 23.3) | 23.2 (22.9, 23.5) | 22.8 (22.4, 23.1) | 0.007  | 0.91  |
|            | Yes | 41.7 (37.4, 46.6) | 38.3 (31.9, 45.9) | 38.2 (32.7, 44.6) | 45.7 (36.1, 57.8) | 38.5 (32.7, 45.4) | 0.52   |       |
| <i>GGT</i> | No  | 67.3 (66.5, 68.1) | 64.2 (63.2, 65.2) | 64.7 (63.8, 65.6) | 64.3 (62.9, 65.6) | 63.7 (62.6, 64.9) | <.0001 | 0.004 |
|            | Yes | 75.4 (70.8, 80.3) | 70.7 (62.5, 80.1) | 71.7 (62.7, 82.1) | 66.3 (55.7, 78.8) | 71.4 (63.9, 79.7) | 0.18   |       |
|            | No  | 21.4 (21.0, 21.8) | 20.5 (19.9, 21.0) | 20.9 (20.4, 21.4) | 21.2 (20.6, 21.9) | 20.2 (19.6, 20.9) | 0.005  |       |
|            | Yes | 53.4 (46.4, 61.4) | 49.3 (38.6, 62.9) | 52.5 (38.1, 72.5) | 41.0 (31.9, 52.9) | 43.0 (33.7, 54.8) | 0.06   |       |

<sup>a</sup> Adjusted for age (20-34, 35-49, 50-64, 65-85 yr), gender (male, female), race and ethnicity (Mexican American, other Hispanic, non-Hispanic White, non-Hispanic Black, other), education (less than 9<sup>th</sup> grade, 9-11<sup>th</sup> grade, high school/GED, some college or AA degree, college and higher), smoking status (Never, former, current smoker with <1 pck/d, current smoker with 1+ pck/d, missing), alcohol consumption (non-drinker, <1, 1- <3, 3-<7 drink/week, 1-<2, 2+ drink/day, missing), day of recall (Monday, Tuesday, Wednesday, Thursday, Friday, Saturday and Sunday), hepatitis B (positive serum hepatitis B surface antigen and core antibody, negative) and hepatitis C (positive serum hepatitis C antibody, negative).

<sup>b</sup> one cup is defined as 10 oz, or 283.5 grams of coffee.

Abbreviations: ALT, alanine aminotransferase; AST, aspartate aminotransferase; ALP, alkaline phosphatase; GGT, gamma glutamyl transaminase; BMI, body-mass index; CI, confidence interval
